# Supplementary material for: Integrative Analyses of Transcriptomes to Explore Common Molecular Effects of Antipsychotic Drugs
Source: MDPI journal article supplement (doi:10.3390/ijms23147508), 2022-07-06
Supplement: s1 [file s1]

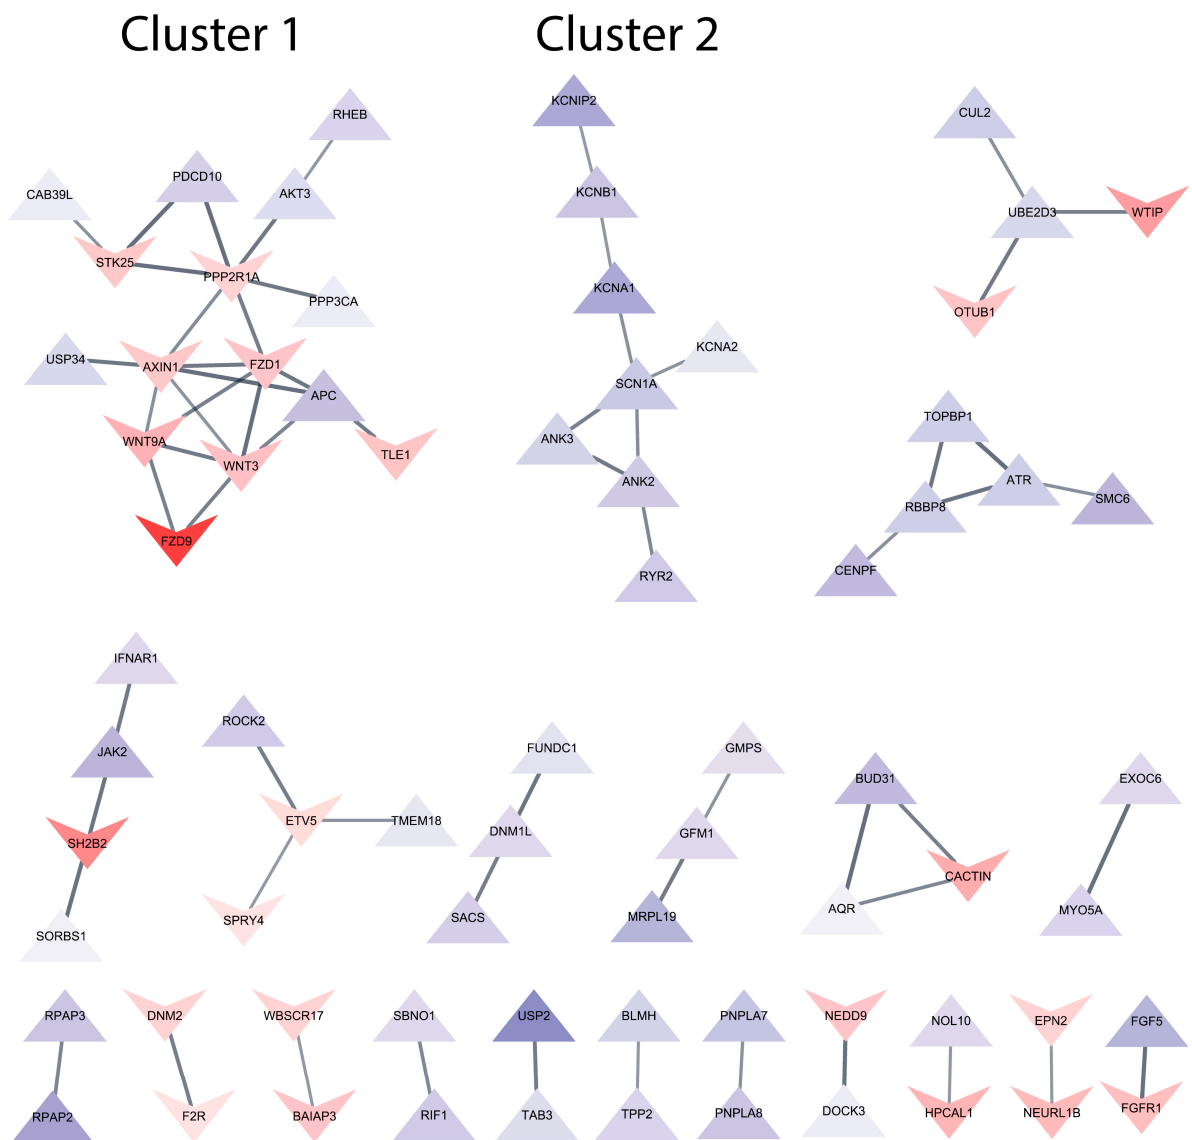

**Figure S1.** Fully constructed protein-protein interaction networks of the commonly reversed genes by four antipsychotic drugs.
