# Supplementary material for: Integrative Analyses of Transcriptomes to Explore Common Molecular Effects of Antipsychotic Drugs
Source: Int J Mol Sci. 2022 Jul 6;23(14):7508. doi: 10.3390/ijms23147508 (PMC9325239; doi:10.3390/ijms23147508)
Supplement: Supplementary file 1 [file ijms-23-07508-s001.zip › Supplementary Table S1.xlsx]

## Sheet: Supplementary Table 1
Supplementary Table S1. Gene ontology (GO) enrichment analysis of 218 reverse regulated genes by all four drugs
ID	Description	GeneRatio	BgRatio	pvalue	p.adjust	qvalue	geneID	Count
GO:0051056	regulation of small GTPase mediated signal transduction	14/194	302/18723	3.36765e-06	0.00970219	0.00873107	10603/83478/9743/1785/23362/7077/253980/8829/2149/23092/10565/1795/57148/81848	14
GO:0071375	cellular response to peptide hormone stimulus	13/194	290/18723	1.08911e-05	0.0105089	0.00945702	10603/1393/9847/490/3717/324/4131/9475/4644/3416/10014/2822/10580	13
GO:0001508	action potential	9/194	134/18723	1.0943e-05	0.0105089	0.00945702	287/6323/288/6262/3745/3736/30819/5774/3737	9
GO:1901653	cellular response to peptide	14/194	359/18723	2.37993e-05	0.0137405	0.0123652	10603/1393/9847/490/3717/324/4131/9475/4644/3416/10135/10014/2822/10580	14
GO:0043434	response to peptide hormone	15/194	414/18723	2.85504e-05	0.0137405	0.0123652	7425/10603/1393/9847/490/3717/324/4131/9475/4644/3416/3692/10014/2822/10580	15
GO:0046578	regulation of Ras protein signal transduction	10/194	189/18723	2.86161e-05	0.0137405	0.0123652	10603/83478/1785/23362/7077/253980/8829/2149/10565/81848	10
GO:1901016	regulation of potassium ion transmembrane transporter activity	6/194	68/18723	7.35217e-05	0.0285519	0.0256941	3755/287/288/3736/1785/30819	6
GO:0060070	canonical Wnt signaling pathway	12/194	303/18723	7.92834e-05	0.0285519	0.0256941	8326/7483/79809/7088/324/8312/8321/55681/7473/9736/4163/5218	12
GO:0032868	response to insulin	11/194	264/18723	0.000100842	0.0301699	0.0271501	7425/10603/9847/490/324/4644/3416/3692/10014/2822/10580	11
GO:0006892	post-Golgi vesicle-mediated transport	7/194	104/18723	0.00010472	0.0301699	0.0271501	23230/4644/288/1785/10133/583/54536	7
GO:1901018	positive regulation of potassium ion transmembrane transporter activity	4/194	27/18723	0.000162719	0.0426176	0.0383519	287/3736/1785/30819	4
GO:1903779	regulation of cardiac conduction	4/194	28/18723	0.000188308	0.0452097	0.0406845	287/490/6262/492	4
GO:0051656	establishment of organelle localization	13/194	390/18723	0.000223659	0.0465281	0.0418709	1063/23122/84984/4131/10494/4644/3800/1785/51566/11235/583/3692/54536	13
GO:0007568	aging	12/194	339/18723	0.0002261	0.0465281	0.0418709	10370/79677/490/4521/545/2937/3416/10135/7077/10000/222236/5530	12
GO:0035637	multicellular organismal signaling	8/194	160/18723	0.000268077	0.0493986	0.0444542	287/490/6323/288/6262/3736/492/3737	8
GO:0032869	cellular response to insulin stimulus	9/194	203/18723	0.000274342	0.0493986	0.0444542	10603/9847/490/324/4644/3416/10014/2822/10580	9
GO:0019228	neuronal action potential	4/194	32/18723	0.000320193	0.0542633	0.0488319	6323/288/3736/3737	4
GO:0006893	Golgi to plasma membrane transport	5/194	60/18723	0.000390301	0.0603963	0.054351	288/1785/10133/583/54536	5
GO:0002042	cell migration involved in sprouting angiogenesis	6/194	94/18723	0.00043789	0.0603963	0.054351	375056/11235/8829/10000/10014/2822	6
GO:1901379	regulation of potassium ion transmembrane transport	6/194	95/18723	0.00046344	0.0603963	0.054351	3755/287/288/3736/1785/30819	6
GO:0034764	positive regulation of transmembrane transport	9/194	219/18723	0.000477789	0.0603963	0.054351	9847/287/288/6262/3736/1785/30819/2149/10580	9
GO:0071805	potassium ion transmembrane transport	9/194	219/18723	0.000477789	0.0603963	0.054351	25769/3755/287/288/3745/3736/1785/30819/3737	9
GO:0086010	membrane depolarization during action potential	4/194	36/18723	0.000507819	0.0603963	0.054351	287/6323/288/5774	4
GO:0051648	vesicle localization	8/194	177/18723	0.000527148	0.0603963	0.054351	23122/84984/4644/3800/1785/583/8224/54536	8
GO:0010038	response to metal ion	12/194	373/18723	0.000534541	0.0603963	0.054351	1393/221184/4521/2937/288/6262/57699/3736/30819/7323/2822/5530	12
GO:0098876	vesicle-mediated transport to the plasma membrane	7/194	136/18723	0.000545055	0.0603963	0.054351	55610/288/1785/84162/10133/583/54536	7
GO:0071241	cellular response to inorganic substance	9/194	226/18723	0.00059932	0.0639497	0.0575488	1393/221184/288/57699/3736/1785/7323/84301/2822	9
GO:0030111	regulation of Wnt signaling pathway	11/194	328/18723	0.000646318	0.0665015	0.0598452	8326/79809/7088/324/8312/55681/7473/9736/5518/4163/5218	11
GO:0016055	Wnt signaling pathway	13/194	444/18723	0.00076179	0.0704579	0.0634056	8326/7483/79809/7088/324/8312/8321/55681/7473/9736/5518/4163/5218	13
GO:0072659	protein localization to plasma membrane	10/194	284/18723	0.00078292	0.0704579	0.0634056	9847/287/23122/9475/4644/288/3745/10133/583/10580	10
GO:0198738	cell-cell signaling by wnt	13/194	446/18723	0.000793894	0.0704579	0.0634056	8326/7483/79809/7088/324/8312/8321/55681/7473/9736/5518/4163/5218	13
GO:0097709	connective tissue replacement	3/194	18/18723	0.000796929	0.0704579	0.0634056	9475/2149/5530	3
GO:0007265	Ras protein signal transduction	11/194	337/18723	0.00080705	0.0704579	0.0634056	10603/83478/9475/1785/23362/7077/253980/8829/2149/10565/81848	11
GO:0051592	response to calcium ion	7/194	149/18723	0.000935777	0.0726602	0.0653874	1393/221184/6262/57699/30819/2822/5530	7
GO:2000369	regulation of clathrin-dependent endocytosis	3/194	19/18723	0.000939163	0.0726602	0.0653874	55681/1785/8527	3
GO:0006813	potassium ion transport	9/194	241/18723	0.00094584	0.0726602	0.0653874	25769/3755/287/288/3745/3736/1785/30819/3737	9
GO:0032414	positive regulation of ion transmembrane transporter activity	6/194	109/18723	0.000958379	0.0726602	0.0653874	287/288/6262/3736/1785/30819	6
GO:0043266	regulation of potassium ion transport	6/194	109/18723	0.000958379	0.0726602	0.0653874	3755/287/288/3736/1785/30819	6
GO:1901381	positive regulation of potassium ion transmembrane transport	4/194	43/18723	0.00100552	0.0728651	0.0655718	287/3736/1785/30819	4
GO:1904064	positive regulation of cation transmembrane transport	7/194	151/18723	0.00101166	0.0728651	0.0655718	287/288/6262/3736/1785/30819/2149	7
GO:0048193	Golgi vesicle transport	10/194	296/18723	0.00107174	0.0753094	0.0677715	84984/23230/375056/4644/288/57511/1785/10133/583/54536	10
GO:0010720	positive regulation of cell development	10/194	298/18723	0.00112743	0.0769043	0.0692067	57611/4739/4131/10494/7473/1785/2119/8829/10059/6009	10
GO:0086001	cardiac muscle cell action potential	5/194	76/18723	0.0011554	0.0769043	0.0692067	287/6323/288/6262/30819	5
GO:0031346	positive regulation of cell projection organization	11/194	353/18723	0.00117452	0.0769043	0.0692067	57611/324/4131/10494/8321/7473/1785/202018/8829/10059/158866	11
GO:0008286	insulin receptor signaling pathway	6/194	116/18723	0.00132311	0.0831361	0.0748148	10603/9847/324/3416/2822/10580	6
GO:0060828	regulation of canonical Wnt signaling pathway	9/194	253/18723	0.00132741	0.0831361	0.0748148	8326/79809/7088/324/8312/55681/9736/4163/5218	9
GO:0050772	positive regulation of axonogenesis	5/194	79/18723	0.00137473	0.084268	0.0758334	57611/4131/10494/7473/8829	5
GO:0051650	establishment of vesicle localization	7/194	161/18723	0.0014667	0.0880324	0.079221	23122/84984/4644/3800/1785/583/54536	7
GO:0032411	positive regulation of transporter activity	6/194	120/18723	0.00157436	0.0925662	0.0833009	287/288/6262/3736/1785/30819	6
GO:0046580	negative regulation of Ras protein signal transduction	4/194	49/18723	0.00164494	0.0947815	0.0852946	83478/7077/253980/81848	4
GO:0051899	membrane depolarization	5/194	83/18723	0.00171311	0.0967737	0.0870873	8326/287/6323/288/5774	5
GO:0043268	positive regulation of potassium ion transport	4/194	50/18723	0.00177367	0.0982679	0.0884319	287/3736/1785/30819	4
GO:0034767	positive regulation of ion transmembrane transport	7/194	167/18723	0.00180797	0.0982787	0.0884416	287/288/6262/3736/1785/30819/2149	7
GO:0034765	regulation of ion transmembrane transport	13/194	491/18723	0.00188057	0.0987884	0.0889004	1393/3755/287/6323/288/6262/3745/3736/1785/30819/2149/5774/3737	13
GO:0051043	regulation of membrane protein ectodomain proteolysis	3/194	24/18723	0.00188839	0.0987884	0.0889004	7077/5774/2822	3
GO:0032412	regulation of ion transmembrane transporter activity	9/194	267/18723	0.00192022	0.0987884	0.0889004	1393/3755/287/288/6262/3736/1785/30819/5774	9
GO:0042391	regulation of membrane potential	12/194	434/18723	0.00195635	0.0988813	0.0889839	8326/287/6323/288/6262/3745/3736/30819/5774/3737/5530/66000	12
GO:1990138	neuron projection extension	7/194	172/18723	0.00213694	0.101812	0.0916218	57611/4131/7473/57699/1785/8829/66000	7
GO:0050804	modulation of chemical synaptic transmission	12/194	439/18723	0.00215039	0.101812	0.0916218	7425/25769/5332/3717/4131/3745/253980/8938/10059/8224/5530/66000	12
GO:0051962	positive regulation of nervous system development	9/194	272/18723	0.00217713	0.101812	0.0916218	57611/4131/10494/7473/2119/8829/10059/347902/6009	9
GO:0010810	regulation of cell-substrate adhesion	8/194	221/18723	0.00219002	0.101812	0.0916218	23122/4739/3717/9475/1785/9480/8829/81848	8
GO:0099177	regulation of trans-synaptic signaling	12/194	440/18723	0.00219104	0.101812	0.0916218	7425/25769/5332/3717/4131/3745/253980/8938/10059/8224/5530/66000	12
GO:0070839	metal ion export	4/194	54/18723	0.00235862	0.10786	0.0970638	490/30819/492/3737	4
GO:0043534	blood vessel endothelial cell migration	7/194	176/18723	0.00243196	0.10846	0.0976038	2260/375056/11235/8829/10000/10014/2822	7
GO:0050769	positive regulation of neurogenesis	8/194	225/18723	0.00244703	0.10846	0.0976038	57611/4131/10494/7473/2119/8829/10059/6009	8
GO:0022898	regulation of transmembrane transporter activity	9/194	278/18723	0.00252083	0.109729	0.0987461	1393/3755/287/288/6262/3736/1785/30819/5774	9
GO:1990778	protein localization to cell periphery	10/194	333/18723	0.00255184	0.109729	0.0987461	9847/287/23122/9475/4644/288/3745/10133/583/10580	10
GO:0007026	negative regulation of microtubule depolymerization	3/194	27/18723	0.00266751	0.112554	0.101288	23122/324/4131	3
GO:0051058	negative regulation of small GTPase mediated signal transduction	4/194	56/18723	0.00269566	0.112554	0.101288	83478/7077/253980/81848	4
GO:0032386	regulation of intracellular transport	10/194	337/18723	0.00278013	0.114422	0.102969	79809/23317/9847/3717/4131/288/3745/11235/51652/7323	10
GO:1900024	regulation of substrate adhesion-dependent cell spreading	4/194	57/18723	0.00287595	0.116699	0.105018	4739/1785/8829/81848	4
GO:0030516	regulation of axon extension	5/194	95/18723	0.00309469	0.122405	0.110153	57611/4131/7473/1785/8829	5
GO:0002040	sprouting angiogenesis	7/194	185/18723	0.00321012	0.122405	0.110153	375056/22905/11235/8829/10000/10014/2822	7
GO:0010769	regulation of cell morphogenesis involved in differentiation	5/194	96/18723	0.0032378	0.122405	0.110153	4739/1785/8829/10059/81848	5
GO:0030072	peptide hormone secretion	8/194	236/18723	0.003277	0.122405	0.110153	7425/1393/3717/3745/3382/8938/2822/5530	8
GO:0021602	cranial nerve morphogenesis	3/194	29/18723	0.00328212	0.122405	0.110153	10370/8829/3737	3
GO:0034067	protein localization to Golgi apparatus	3/194	29/18723	0.00328212	0.122405	0.110153	23230/10133/158866	3
GO:0023061	signal release	12/194	463/18723	0.00331398	0.122405	0.110153	7425/1393/3717/3745/3382/8938/2149/10059/8224/2822/3737/5530	12
GO:0010632	regulation of epithelial cell migration	9/194	292/18723	0.00349121	0.127319	0.114575	2260/23122/9475/11235/8829/10000/4163/10014/2822	9
GO:0090314	positive regulation of protein targeting to membrane	3/194	30/18723	0.00361925	0.130338	0.117292	9847/288/3745	3
GO:0060047	heart contraction	8/194	241/18723	0.00371988	0.132308	0.119065	287/490/3717/6323/6262/30819/10059/492	8
GO:0002790	peptide secretion	8/194	242/18723	0.00381377	0.133781	0.12039	7425/1393/3717/3745/3382/8938/2822/5530	8
GO:0045807	positive regulation of endocytosis	5/194	100/18723	0.00385816	0.133781	0.12039	55681/1785/10059/5530/8527	5
GO:0031114	regulation of microtubule depolymerization	3/194	31/18723	0.00397676	0.133781	0.12039	23122/324/4131	3
GO:0010631	epithelial cell migration	10/194	357/18723	0.0041788	0.133781	0.12039	2260/23122/9475/375056/11235/8829/10000/4163/10014/2822	10
GO:1904062	regulation of cation transmembrane transport	10/194	357/18723	0.0041788	0.133781	0.12039	1393/3755/287/288/6262/3736/1785/30819/2149/5774	10
GO:0030073	insulin secretion	7/194	195/18723	0.00428383	0.133781	0.12039	7425/3717/3745/3382/8938/2822/5530	7
GO:0009306	protein secretion	10/194	359/18723	0.00434471	0.133781	0.12039	7425/3717/375056/3745/3382/8938/2149/10059/2822/5530	10
GO:0010644	cell communication by electrical coupling	3/194	32/18723	0.00435503	0.133781	0.12039	288/6262/3736	3
GO:0090276	regulation of peptide hormone secretion	7/194	196/18723	0.00440451	0.133781	0.12039	1393/3717/3745/3382/8938/2822/5530	7
GO:0035592	establishment of protein localization to extracellular region	10/194	360/18723	0.00442959	0.133781	0.12039	7425/3717/375056/3745/3382/8938/2149/10059/2822/5530	10
GO:0090132	epithelium migration	10/194	360/18723	0.00442959	0.133781	0.12039	2260/23122/9475/375056/11235/8829/10000/4163/10014/2822	10
GO:0051222	positive regulation of protein transport	9/194	303/18723	0.0044424	0.133781	0.12039	9847/3717/288/3745/8938/11235/10059/7323/2822	9
GO:0071248	cellular response to metal ion	7/194	197/18723	0.00452775	0.133781	0.12039	1393/221184/288/57699/3736/7323/2822	7
GO:0090287	regulation of cellular response to growth factor stimulus	9/194	304/18723	0.004538	0.133781	0.12039	2260/10370/1785/9480/22905/7323/56937/81848/66000	9
GO:1902946	protein localization to early endosome	2/194	10/18723	0.00455068	0.133781	0.12039	9475/8829	2
GO:1903998	regulation of eating behavior	2/194	10/18723	0.00455068	0.133781	0.12039	79809/222236	2
GO:2000252	negative regulation of feeding behavior	2/194	10/18723	0.00455068	0.133781	0.12039	79809/222236	2
GO:0009914	hormone transport	9/194	306/18723	0.00473401	0.136664	0.122984	7425/1393/3717/3745/6567/3382/8938/2822/5530	9
GO:0003015	heart process	8/194	251/18723	0.00474362	0.136664	0.122984	287/490/3717/6323/6262/30819/10059/492	8
GO:0090130	tissue migration	10/194	365/18723	0.00487384	0.136901	0.123198	2260/23122/9475/375056/11235/8829/10000/4163/10014/2822	10
GO:0002791	regulation of peptide secretion	7/194	200/18723	0.00491313	0.136901	0.123198	1393/3717/3745/3382/8938/2822/5530	7
GO:0030038	contractile actin filament bundle assembly	5/194	106/18723	0.00494195	0.136901	0.123198	23122/9475/253980/8829/10580	5
GO:0043149	stress fiber assembly	5/194	106/18723	0.00494195	0.136901	0.123198	23122/9475/253980/8829/10580	5
GO:0032409	regulation of transporter activity	9/194	310/18723	0.00514578	0.137005	0.123291	1393/3755/287/288/6262/3736/1785/30819/5774	9
GO:0071692	protein localization to extracellular region	10/194	368/18723	0.00515676	0.137005	0.123291	7425/3717/375056/3745/3382/8938/2149/10059/2822/5530	10
GO:0044319	wound healing, spreading of cells	3/194	34/18723	0.00517517	0.137005	0.123291	83478/23122/11235	3
GO:0090505	epiboly involved in wound healing	3/194	34/18723	0.00517517	0.137005	0.123291	83478/23122/11235	3
GO:0090087	regulation of peptide transport	7/194	202/18723	0.00518344	0.137005	0.123291	1393/3717/3745/3382/8938/2822/5530	7
GO:0021604	cranial nerve structural organization	2/194	11/18723	0.00552416	0.139522	0.125557	8829/3737	2
GO:0045161	neuronal ion channel clustering	2/194	11/18723	0.00552416	0.139522	0.125557	132320/30819	2
GO:0072497	mesenchymal stem cell differentiation	2/194	11/18723	0.00552416	0.139522	0.125557	8321/7473	2
GO:0086070	SA node cell to atrial cardiac muscle cell communication	2/194	11/18723	0.00552416	0.139522	0.125557	287/6262	2
GO:0090649	response to oxygen-glucose deprivation	2/194	11/18723	0.00552416	0.139522	0.125557	10135/10059	2
GO:0071108	protein K48-linked deubiquitination	3/194	35/18723	0.00561768	0.139522	0.125557	55611/9736/80013	3
GO:0090504	epiboly	3/194	35/18723	0.00561768	0.139522	0.125557	83478/23122/11235	3
GO:0019226	transmission of nerve impulse	4/194	69/18723	0.00571792	0.140798	0.126705	6323/288/3736/3737	4
GO:0061387	regulation of extent of cell growth	5/194	110/18723	0.00577458	0.140988	0.126876	57611/4131/7473/1785/8829	5
GO:0007030	Golgi organization	6/194	157/18723	0.00595016	0.142854	0.128555	23122/10494/1785/10133/11235/10565	6
GO:0051017	actin filament bundle assembly	6/194	157/18723	0.00595016	0.142854	0.128555	23122/4739/9475/253980/8829/10580	6
GO:0090313	regulation of protein targeting to membrane	3/194	36/18723	0.00608222	0.144817	0.130322	9847/288/3745	3
GO:1904951	positive regulation of establishment of protein localization	9/194	319/18723	0.00617384	0.145794	0.131201	9847/3717/288/3745/8938/11235/10059/7323/2822	9
GO:0000281	mitotic cytokinesis	4/194	71/18723	0.00632473	0.147043	0.132325	324/9475/288/51652	4
GO:0015833	peptide transport	8/194	264/18723	0.00638278	0.147043	0.132325	7425/1393/3717/3745/3382/8938/2822/5530	8
GO:0090316	positive regulation of intracellular protein transport	6/194	160/18723	0.00651118	0.147043	0.132325	9847/3717/288/3745/11235/7323	6
GO:0007015	actin filament organization	11/194	442/18723	0.00652423	0.147043	0.132325	23122/4739/3717/9475/283431/201191/4644/253980/8829/10565/10580	11
GO:1904953	Wnt signaling pathway involved in midbrain dopaminergic neuron differentiation	2/194	12/18723	0.00658401	0.147043	0.132325	8321/7473	2
GO:1905205	positive regulation of connective tissue replacement	2/194	12/18723	0.00658401	0.147043	0.132325	9475/5530	2
GO:1990034	calcium ion export across plasma membrane	2/194	12/18723	0.00658401	0.147043	0.132325	490/492	2
GO:0061572	actin filament bundle organization	6/194	161/18723	0.00670645	0.148625	0.133749	23122/4739/9475/253980/8829/10580	6
GO:0050708	regulation of protein secretion	8/194	268/18723	0.00696473	0.153171	0.13784	3717/3745/3382/8938/2149/10059/2822/5530	8
GO:0070972	protein localization to endoplasmic reticulum	4/194	74/18723	0.00731278	0.159607	0.143631	287/375056/6262/202018	4
GO:0050796	regulation of insulin secretion	6/194	165/18723	0.00753021	0.161343	0.145194	3717/3745/3382/8938/2822/5530	6
GO:2001259	positive regulation of cation channel activity	4/194	75/18723	0.00766345	0.161343	0.145194	287/288/3736/30819	4
GO:0005513	detection of calcium ion	2/194	13/18723	0.00772834	0.161343	0.145194	6262/30819	2
GO:0010960	magnesium ion homeostasis	2/194	13/18723	0.00772834	0.161343	0.145194	288/3736	2
GO:0034112	positive regulation of homotypic cell-cell adhesion	2/194	13/18723	0.00772834	0.161343	0.145194	3717/288	2
GO:1905203	regulation of connective tissue replacement	2/194	13/18723	0.00772834	0.161343	0.145194	9475/5530	2
GO:0140115	export across plasma membrane	4/194	76/18723	0.008025	0.165663	0.149082	490/30819/492/3737	4
GO:0043270	positive regulation of ion transport	8/194	275/18723	0.00807867	0.165663	0.149082	287/490/288/6262/3736/1785/30819/2149	8
GO:0031111	negative regulation of microtubule polymerization or depolymerization	3/194	40/18723	0.00816586	0.165663	0.149082	23122/324/4131	3
GO:0043001	Golgi to plasma membrane protein transport	3/194	40/18723	0.00816586	0.165663	0.149082	288/10133/583	3
GO:1903829	positive regulation of cellular protein localization	8/194	276/18723	0.00824813	0.165663	0.149082	9847/3717/324/9475/288/3745/7323/10580	8
GO:0048675	axon extension	5/194	120/18723	0.00828029	0.165663	0.149082	57611/4131/7473/1785/8829	5
GO:1900026	positive regulation of substrate adhesion-dependent cell spreading	3/194	41/18723	0.00874433	0.172002	0.154785	4739/1785/8829	3
GO:0043542	endothelial cell migration	8/194	279/18723	0.00877255	0.172002	0.154785	2260/9475/375056/11235/8829/10000/10014/2822	8
GO:0090049	regulation of cell migration involved in sprouting angiogenesis	4/194	78/18723	0.00878132	0.172002	0.154785	11235/8829/10000/10014	4
GO:0010421	hydrogen peroxide-mediated programmed cell death	2/194	14/18723	0.00895531	0.172002	0.154785	10494/11235	2
GO:0050966	detection of mechanical stimulus involved in sensory perception of pain	2/194	14/18723	0.00895531	0.172002	0.154785	6323/3736	2
GO:0051645	Golgi localization	2/194	14/18723	0.00895531	0.172002	0.154785	10494/11235	2
GO:0010770	positive regulation of cell morphogenesis involved in differentiation	4/194	79/18723	0.00917634	0.17508	0.157555	4739/1785/8829/10059	4
GO:0045773	positive regulation of axon extension	3/194	42/18723	0.00934625	0.177148	0.159417	57611/4131/8829	3
GO:0006509	membrane protein ectodomain proteolysis	3/194	43/18723	0.0099718	0.181399	0.163242	7077/5774/2822	3
GO:0090278	negative regulation of peptide hormone secretion	3/194	43/18723	0.0099718	0.181399	0.163242	1393/3745/5530	3
GO:0010959	regulation of metal ion transport	10/194	406/18723	0.00997581	0.181399	0.163242	3755/287/490/288/6262/3736/1785/30819/2149/5774	10
GO:1903533	regulation of protein targeting	4/194	81/18723	0.0100007	0.181399	0.163242	9847/288/3745/7323	4
GO:0010634	positive regulation of epithelial cell migration	6/194	176/18723	0.0101697	0.181399	0.163242	2260/23122/9475/8829/10000/2822	6
GO:0016197	endosomal transport	7/194	230/18723	0.0102517	0.181399	0.163242	55610/84162/8938/51652/10059/54497/51617	7
GO:0034638	phosphatidylcholine catabolic process	2/194	15/18723	0.0102631	0.181399	0.163242	50640/375775	2
GO:0048308	organelle inheritance	2/194	15/18723	0.0102631	0.181399	0.163242	10494/11235	2
GO:0048313	Golgi inheritance	2/194	15/18723	0.0102631	0.181399	0.163242	10494/11235	2
GO:0097468	programmed cell death in response to reactive oxygen species	2/194	15/18723	0.0102631	0.181399	0.163242	10494/11235	2
GO:1901660	calcium ion export	2/194	15/18723	0.0102631	0.181399	0.163242	490/492	2
GO:0002792	negative regulation of peptide secretion	3/194	44/18723	0.0106212	0.184873	0.166369	1393/3745/5530	3
GO:0007528	neuromuscular junction development	3/194	44/18723	0.0106212	0.184873	0.166369	8326/288/2149	3
GO:0048015	phosphatidylinositol-mediated signaling	6/194	178/18723	0.0107122	0.184873	0.166369	9651/2260/5332/3717/57624/2149	6
GO:0010594	regulation of endothelial cell migration	7/194	232/18723	0.0107164	0.184873	0.166369	2260/9475/11235/8829/10000/10014/2822	7
GO:0048588	developmental cell growth	7/194	234/18723	0.0111962	0.187505	0.168737	57611/4131/7473/57699/1785/8829/66000	7
GO:0060560	developmental growth involved in morphogenesis	7/194	234/18723	0.0111962	0.187505	0.168737	57611/4131/7473/57699/1785/8829/66000	7
GO:0003254	regulation of membrane depolarization	3/194	45/18723	0.0112945	0.187505	0.168737	8326/288/5774	3
GO:0006903	vesicle targeting	3/194	45/18723	0.0112945	0.187505	0.168737	23122/84984/54536	3
GO:0008631	intrinsic apoptotic signaling pathway in response to oxidative stress	3/194	45/18723	0.0112945	0.187505	0.168737	3717/10494/11235	3
GO:2000273	positive regulation of signaling receptor activity	3/194	45/18723	0.0112945	0.187505	0.168737	3717/8896/8829	3
GO:0006887	exocytosis	9/194	352/18723	0.0113462	0.187505	0.168737	1393/23122/375056/3745/8938/27072/10059/10565/54536	9
GO:0008361	regulation of cell size	6/194	181/18723	0.011564	0.187505	0.168737	57611/4131/7473/1785/8829/10000	6
GO:0051770	positive regulation of nitric-oxide synthase biosynthetic process	2/194	16/18723	0.0116499	0.187505	0.168737	3717/10135	2
GO:0099509	regulation of presynaptic cytosolic calcium ion concentration	2/194	16/18723	0.0116499	0.187505	0.168737	490/492	2
GO:1904948	midbrain dopaminergic neuron differentiation	2/194	16/18723	0.0116499	0.187505	0.168737	8321/7473	2
GO:2000651	positive regulation of sodium ion transmembrane transporter activity	2/194	16/18723	0.0116499	0.187505	0.168737	288/1785	2
GO:0071277	cellular response to calcium ion	4/194	85/18723	0.0117902	0.187713	0.168924	1393/221184/57699/2822	4
GO:0048017	inositol lipid-mediated signaling	6/194	182/18723	0.0118583	0.187713	0.168924	9651/2260/5332/3717/57624/2149	6
GO:0060401	cytosolic calcium ion transport	6/194	182/18723	0.0118583	0.187713	0.168924	25769/287/490/6262/2149/492	6
GO:0007019	microtubule depolymerization	3/194	46/18723	0.0119919	0.187911	0.169102	23122/324/4131	3
GO:0046879	hormone secretion	8/194	295/18723	0.0120012	0.187911	0.169102	7425/1393/3717/3745/3382/8938/2822/5530	8
GO:0007569	cell aging	5/194	132/18723	0.0121772	0.189636	0.170655	10370/79677/545/10135/10000	5
GO:2001257	regulation of cation channel activity	6/194	184/18723	0.0124626	0.193037	0.173715	1393/3755/287/288/3736/30819	6
GO:0010595	positive regulation of endothelial cell migration	5/194	133/18723	0.0125495	0.193135	0.173803	2260/9475/8829/10000/2822	5
GO:0072583	clathrin-dependent endocytosis	3/194	47/18723	0.0127136	0.193135	0.173803	55681/1785/8527	3
GO:0032886	regulation of microtubule-based process	7/194	240/18723	0.0127294	0.193135	0.173803	79809/23122/324/4131/9475/583/51652	7
GO:0048041	focal adhesion assembly	4/194	87/18723	0.0127572	0.193135	0.173803	23122/9475/8829/10580	4
GO:0072594	establishment of protein localization to organelle	10/194	422/18723	0.0128129	0.193135	0.173803	3717/54492/23230/6262/10527/27072/7323/158866/9512/5530	10
GO:0048521	negative regulation of behavior	2/194	17/18723	0.013114	0.193135	0.173803	79809/222236	2
GO:0048532	anatomical structure arrangement	2/194	17/18723	0.013114	0.193135	0.173803	8829/3737	2
GO:1903358	regulation of Golgi organization	2/194	17/18723	0.013114	0.193135	0.173803	1785/11235	2
GO:1903818	positive regulation of voltage-gated potassium channel activity	2/194	17/18723	0.013114	0.193135	0.173803	3736/30819	2
GO:0016050	vesicle organization	8/194	300/18723	0.0131698	0.193135	0.173803	23317/9847/375056/8938/27072/51652/2149/158866	8
GO:0044772	mitotic cell cycle phase transition	10/194	424/18723	0.0132064	0.193135	0.173803	1063/23122/8453/324/1785/11073/5932/5218/64682/5530	10
GO:0042886	amide transport	8/194	301/18723	0.0134132	0.195169	0.175634	7425/1393/3717/3745/3382/8938/2822/5530	8
GO:0050808	synapse organization	10/194	426/18723	0.0136088	0.196513	0.176843	8326/4131/8321/288/8829/2149/10059/347902/158866/66000	10
GO:0031589	cell-substrate adhesion	9/194	363/18723	0.013642	0.196513	0.176843	23122/4739/3717/9475/1785/9480/8829/81848/10580	9
GO:0050767	regulation of neurogenesis	9/194	364/18723	0.0138666	0.198754	0.178861	57611/4131/10494/7473/2119/8829/10059/6009/5530	9
GO:0090090	negative regulation of canonical Wnt signaling pathway	5/194	137/18723	0.0141158	0.201324	0.181173	7088/324/8312/55681/4163	5
GO:0009395	phospholipid catabolic process	3/194	49/18723	0.0142302	0.201957	0.181742	50640/375775/222236	3
GO:0031668	cellular response to extracellular stimulus	7/194	246/18723	0.0144084	0.202491	0.182223	490/4521/3745/10135/27072/10059/54407	7
GO:0051402	neuron apoptotic process	7/194	246/18723	0.0144084	0.202491	0.182223	8326/3717/3745/8829/2149/27324/84899	7
GO:0001956	positive regulation of neurotransmitter secretion	2/194	18/18723	0.0146537	0.203948	0.183534	8938/10059	2
GO:2000641	regulation of early endosome to late endosome transport	2/194	18/18723	0.0146537	0.203948	0.183534	23317/51652	2
GO:0051983	regulation of chromosome segregation	4/194	91/18723	0.0148396	0.205543	0.18497	1063/79677/324/64682	4
GO:0051646	mitochondrion localization	3/194	50/18723	0.0150253	0.207119	0.186388	4131/51566/10059	3
GO:0046883	regulation of hormone secretion	7/194	249/18723	0.0153048	0.209967	0.188951	1393/3717/3745/3382/8938/2822/5530	7
GO:0043124	negative regulation of I-kappaB kinase/NF-kappaB signaling	3/194	51/18723	0.015845	0.212062	0.190836	58509/7088/10133	3
GO:0030705	cytoskeleton-dependent intracellular transport	6/194	195/18723	0.0161775	0.212062	0.190836	79809/4131/4644/3800/51566/66000	6
GO:0090257	regulation of muscle system process	7/194	252/18723	0.0162402	0.212062	0.190836	287/490/9475/6262/3736/2149/5530	7
GO:0032011	ARF protein signal transduction	2/194	19/18723	0.0162671	0.212062	0.190836	23362/10565	2
GO:0032012	regulation of ARF protein signal transduction	2/194	19/18723	0.0162671	0.212062	0.190836	23362/10565	2
GO:0032026	response to magnesium ion	2/194	19/18723	0.0162671	0.212062	0.190836	288/3736	2
GO:0035313	wound healing, spreading of epidermal cells	2/194	19/18723	0.0162671	0.212062	0.190836	83478/23122	2
GO:0086014	atrial cardiac muscle cell action potential	2/194	19/18723	0.0162671	0.212062	0.190836	287/6262	2
GO:0086026	atrial cardiac muscle cell to AV node cell signaling	2/194	19/18723	0.0162671	0.212062	0.190836	287/6262	2
GO:0086066	atrial cardiac muscle cell to AV node cell communication	2/194	19/18723	0.0162671	0.212062	0.190836	287/6262	2
GO:0097623	potassium ion export across plasma membrane	2/194	19/18723	0.0162671	0.212062	0.190836	30819/3737	2
GO:0021545	cranial nerve development	3/194	52/18723	0.0166895	0.215617	0.194035	10370/8829/3737	3
GO:0048260	positive regulation of receptor-mediated endocytosis	3/194	52/18723	0.0166895	0.215617	0.194035	55681/1785/8527	3
GO:0006605	protein targeting	8/194	314/18723	0.0168843	0.21716	0.195424	9847/23230/288/3745/27072/7323/158866/9512	8
GO:0007044	cell-substrate junction assembly	4/194	95/18723	0.0171252	0.218309	0.196458	23122/9475/8829/10580	4
GO:0045666	positive regulation of neuron differentiation	4/194	95/18723	0.0171252	0.218309	0.196458	2260/4131/2119/7077	4
GO:0051960	regulation of nervous system development	10/194	443/18723	0.0174118	0.220854	0.198748	57611/4131/10494/7473/2119/8829/10059/347902/6009/5530	10
GO:1903522	regulation of blood circulation	7/194	256/18723	0.0175497	0.220854	0.198748	287/490/3717/6262/30819/2149/492	7
GO:0097479	synaptic vesicle localization	3/194	53/18723	0.0175588	0.220854	0.198748	3800/1785/8224	3
GO:0043524	negative regulation of neuron apoptotic process	5/194	145/18723	0.0176315	0.220854	0.198748	8326/3717/8829/2149/27324	5
